# Supplementary material
Source: Springer Nature journal article supplement (https://springermedizin.de/resource/supplementary/12873_2009_74_MOESM4_ESM.pdf/9431962)

**A**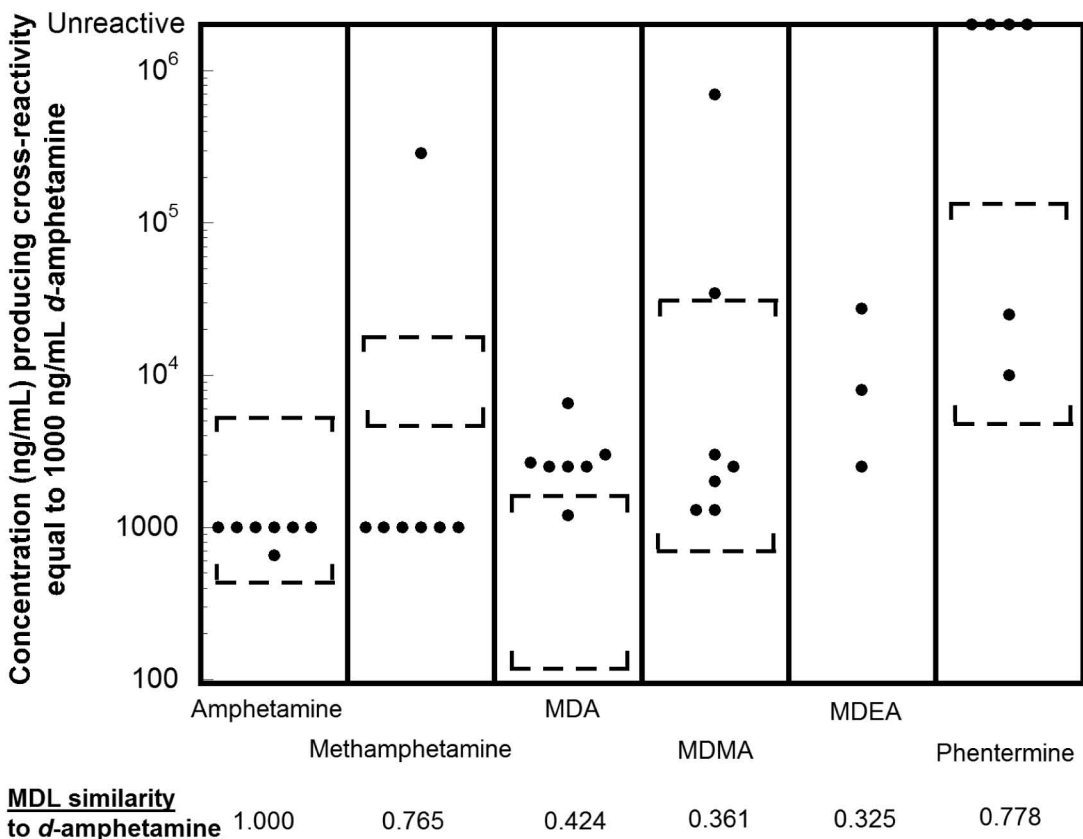**B**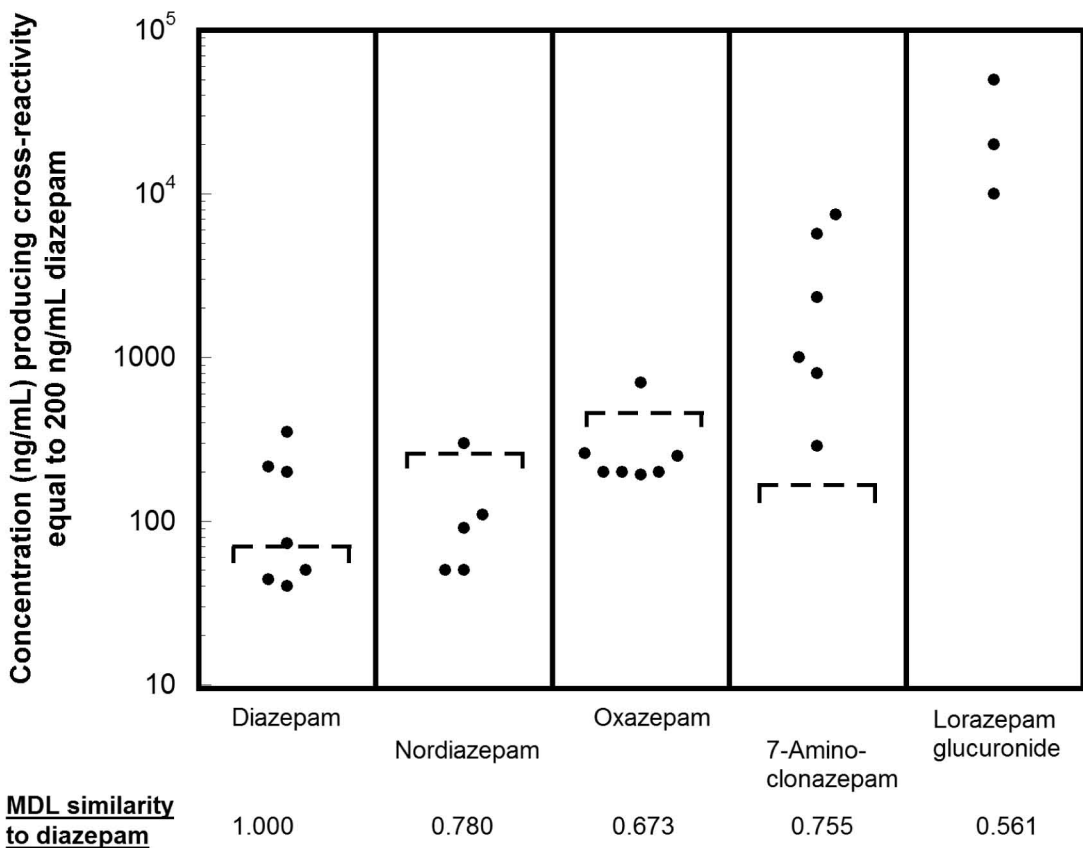

Supplement: MOESM4 [file 9431962]
